# Supplementary material for: Monocytes and pyrophosphate promote mesenchymal stem cell viability and early osteogenic differentiation
Source: PubMed Central journal article supplement (PMC8761140; doi:10.1007/s10856-021-06639-y), 2022-01-15
Supplement: 10856_2021_6639_MOESM1_ESM.pdf [file 10856_2021_6639_MOESM1_ESM.pdf]

## **Monocytes and pyrophosphate promote mesenchymal stem cell viability and early osteogenic differentiation**

Journal of Materials Science: Materials in Medicine

Sara Svensson<sup>1</sup>, Michael Palmer<sup>2</sup>, Johan Svensson<sup>3</sup>, Anna Johansson<sup>1</sup>, Håkan Engqvist<sup>2</sup>, Omar Omar<sup>4</sup> and Peter Thomsen<sup>1,\*</sup>

<sup>1</sup>Department of Biomaterials, Institute of Clinical Sciences, Sahlgrenska Academy, University of Gothenburg, Gothenburg, Sweden

<sup>2</sup>Department of Engineering Sciences, Applied Materials Science Section, Uppsala University, Uppsala, Sweden

<sup>3</sup>Department of Statistics, Umeå School of Business, Economics and Statistics, Umeå University, Umeå, Sweden

<sup>4</sup>Department of Biomedical Dental Sciences, College of Dentistry, Imam Abdulrahman bin Faisal University, Dammam, Saudi Arabia

### **\*Correspondence**

Peter Thomsen, MD, PhD, Professor

Department of Biomaterials, Institute of Clinical Sciences, Sahlgrenska Academy at the University of Gothenburg, Box 412, SE-405 30 Gothenburg, Sweden

Telephone: + 46 (0) 705255554

Email: [peter.thomsen@biomaterials.gu.se](mailto:peter.thomsen@biomaterials.gu.se)

### Reference gene screening

Screening for best stable reference gene(s) was conducted on a panel of selected 8 human reference genes (TATAA Biocenter AB, Gothenburg, Sweden) (Table S1), in accordance with the MIQE guidelines for the performance and reporting of the gene expression analysis [1]. The C<sub>q</sub> values from the qPCR screening assays were subsequently analyzed in GenEx software version 6 (MultiD Analyses AB, Gothenburg, Sweden), using both the geNorm and NormFinder algorithms. Based on this analysis, a single reference gene was recommended for normalization, and the tyrosine 3-monooxygenase/tryptophan 5-monooxygenase activation protein zeta (YWHAZ) was identified as the best stable reference gene, and, therefore selected for normalization.

1. Bustin, S. A., Benes, V., Garson, J. A., Hellems, J., Huggett, J., Kubista, M., Mueller, R., Nolan, T., Pfaffl, M. W., Shipley, G. L., Vandesompele, J. & Wittwer, C. T. The miqe guidelines: Minimum information for publication of quantitative re-al-time pcr experiments. Clin Chem 2009;55:611-622.

**Table S1:** List of reference genes used for the screening and selection of best stable reference gene(s) for normalization.

| Abbreviation | Full name (according to NCBI database)                                      |
|--------------|-----------------------------------------------------------------------------|
| YWHAZ        | Tyrosine 3-monooxygenase/tryptophan 5-monooxygenase activation protein zeta |
| PPIA         | Peptidylprolyl isomerase A                                                  |
| B2M          | Beta-2-microglobulin                                                        |
| HPRT1        | Hypoxanthine phosphoribosyltransferase 1                                    |
| TBP          | TATA-box binding protein                                                    |
| RPLP         | 50S ribosomal subunit protein L16                                           |
| UBC          | Ubiquitin C                                                                 |
| 18S          | Ribosomal protein S18                                                       |

## Statistical analysis

Due to the large number of related response variables in the experiment, the statistical analyses were carried out using multivariate analysis of variance (MANOVA). Here, the responses were divided into six different groups: 1) monocyte cell numbers and cell viability (three responses), 2) MSC cell numbers and cell viability (three responses), 3) MSC bone-related gene expression (six responses), 4) MSC proliferation-related gene expression (two responses), 5) MSC death-related gene expression (two responses), and 6) MSC fat- and cartilage-related genes (two responses). For the group of monocyte response variables, a MANOVA with the factors LPS (two levels; with and without LPS) and Materials (four levels; PPI0, PPI1, PPI2 and PPI3) was performed. For the five groups of MSC response variables, additional two factors were included in the MANOVA: Condition (three levels; CM, CtrlM and DEM) and interaction between LPS and Condition.

The Wilks'  $\lambda$  test statistic assesses if the factors relate to any of the responses. If so, the relationships between individual factors and responses were further investigated by ANOVAs (Table S2). This approach protects against false-positive results related to mass significance. For evaluation of the difference in response between factor levels, the estimated marginal means with Bonferroni correction was used (presented in the figures).

**Table S2:** Multivariate analyses of variances (MANOVAs) for monocyte and mesenchymal stem cell (MSC) cell number and viability as well as the gene expression in MSCs (Tests of Between-Subjects Effects).

|                                |                    | MANOVAS                        | Factors ( <i>P-value</i> ) |           |          |               | R <sup>2#</sup> |
|--------------------------------|--------------------|--------------------------------|----------------------------|-----------|----------|---------------|-----------------|
|                                |                    |                                | LPS                        | Condition | Material | LPS×Condition |                 |
| Monocytes number and viability | Wilks' $\lambda^*$ | Adherent cells                 | <0.001                     | N.A.      | 0.003    | N.A.          |                 |
|                                |                    | Supernatant cells <sup>Δ</sup> | 0.001                      | N.A.      | 0.858    | N.A.          | 28%             |
|                                | Response           | Supernatant cells <sup>Δ</sup> | 0.022                      | N.A.      | <0.001   | N.A.          | 50%             |
|                                |                    | Viability                      | 0.078                      | N.A.      | 0.951    | N.A.          | 9%              |
| MSC number and viability       | Wilks' $\lambda$   | Adherent cells <sup>Δ</sup>    | <0.001                     | <0.001    | 0.284    | <0.001        |                 |
|                                |                    | Supernatant cells              | 0.889                      | 0.074     | 0.728    | 0.58          | 7%              |
|                                | Response           | Supernatant cells              | <0.001                     | <0.001    | 0.48     | <0.001        | 62%             |
|                                |                    | Viability                      | <0.001                     | <0.001    | 0.021    | <0.001        | 77%             |
| Bone-related gene expression   | Wilks' $\lambda$   | <i>ALP</i>                     | <0.001                     | <0.001    | 0.15     | 0.003         |                 |
|                                |                    | <i>BMP-2</i>                   | <0.001                     | <0.001    | 0.463    | 0.016         | 32%             |
|                                | Response           | <i>COL1A1</i>                  | 0.443                      | 0.035     | 0.554    | 0.468         | 10%             |
|                                |                    | <i>RUNX2</i>                   | 0.079                      | 0.031     | 0.281    | 0.196         | 15%             |
|                                |                    | <i>OPN</i>                     | 0.013                      | 0.013     | 0.967    | 0.034         | 18%             |
|                                |                    | <i>OPN</i>                     | 0.127                      | 0.757     | 0.372    | 0.162         | 8%              |
|                                |                    | <i>TGF-β</i>                   | 0.251                      | 0.748     | 0.349    | 0.587         | 6%              |
| Proliferation-related genes    | Wilks' $\lambda$   | <i>KI67</i> <sup>Δ</sup>       | 0.481                      | 0.933     | 0.516    | 0.309         |                 |
|                                |                    | <i>PCNA</i>                    | 0.228                      | 0.844     | 0.546    | 0.369         | 6%              |
|                                | Response           | <i>PCNA</i>                    | 0.841                      | 0.809     | 0.395    | 0.225         | 6%              |
| Death-related genes            | Wilks' $\lambda$   | <i>CASP3</i>                   | 0.075                      | 0.025     | 0.614    | 0.006         |                 |
|                                |                    | <i>P53</i>                     | 0.433                      | 0.386     | 0.347    | 0.005         | 14%             |
|                                | Response           | <i>P53</i>                     | 0.31                       | 0.348     | 0.364    | 0.685         | 7%              |
| Fat & cartilage-related genes  | Wilks' $\lambda$   | <i>PPAR-γ</i> <sup>Δ</sup>     | <0.001                     | <0.001    | 0.008    | <0.001        |                 |
|                                |                    | <i>SOX9</i> <sup>Δ</sup>       | <0.001                     | <0.001    | 0.637    | <0.001        | 49%             |
|                                | Response           | <i>SOX9</i> <sup>Δ</sup>       | <0.001                     | <0.001    | 0.007    | <0.001        | 50%             |

\* = Multivariate test statistic related to MANOVA.

# = Coefficient of determination.

Δ = Sensitivity analysis using bootstrap is presented since the homoeasticity assumption was doubtful.
